# Supplementary material for: A Computational Investigation of the Binding of the Selenium Analogues of Ergothioneine and Ovothiol to Cu(I) and Cu(II) and the Effect of Binding on the Redox Potential of the Cu(II)/Cu(I) Redox Couple
Source: Hindawi journal article supplement (doi:10.1155/2019/9593467), 2019-02-07
Supplement: f1 [file 9593467.f1.pdf]

**A Computational Investigation of the Binding of the Selenium Analogues of Ergothioneine and Ovothiol to Cu(I) and Cu(II) and the Effect of Binding on the Redox Potential of the Cu(II)/Cu(I) Redox Couple.**

*Jacqueline Wiebe<sup>#</sup>, Vasyl Zalisky<sup>#</sup> and Eric A. C. Bushnell\**

Author to whom correspondence should be addressed:

Email: bushnelle@brandonu.ca

Phone: 204 571 7899

**Supporting Information 12 pages in Total**

**Table S1.** The Boltzmann equation used for the calculation of the relative populations of the Cu-OSeH and Cu-ESeH complexes.  $N_i/N$  is the relative population of species  $i$ ,  $\mu_i$  is the relative chemical potential in solution for species  $i$ ,  $g_i$  is the degeneracy, and  $\sum g_i e^{\mu_i/RT}$  is the partition function.

$$\frac{N_i}{N} = \frac{g_i e^{\mu_i/RT}}{\sum g_i e^{\mu_i/RT}}$$

**Table S2.** All xyz-coordinates of the selenium containing compounds optimized at the BP86/6-311+G(2df,p) level of theory.

*cis*-Cu(II)(OSe)<sub>2</sub>

|    |   |          |          |          |
|----|---|----------|----------|----------|
| C  | 0 | -0.00702 | -0.45636 | 0.13559  |
| N  | 0 | 1.33486  | -0.17131 | -0.15877 |
| C  | 0 | -0.62851 | 0.77689  | 0.2006   |
| C  | 0 | 1.46922  | 1.17963  | -0.26276 |
| N  | 0 | 0.30313  | 1.77775  | -0.04527 |
| H  | 0 | 2.41389  | 1.66537  | -0.49199 |
| C  | 0 | -0.39768 | 7.3503   | -0.17373 |
| N  | 0 | 0.94938  | 7.20256  | 0.18984  |
| C  | 0 | -0.88627 | 6.06036  | -0.26718 |
| C  | 0 | 1.21502  | 5.87205  | 0.30425  |
| N  | 0 | 0.12855  | 5.1589   | 0.02886  |
| H  | 0 | 2.1912   | 5.4844   | 0.58294  |
| Se | 0 | -2.3743  | 1.46945  | 0.47786  |
| Se | 0 | -2.53596 | 5.19442  | -0.63179 |
| C  | 0 | 2.40096  | -1.14841 | -0.31111 |
| H  | 0 | 3.33459  | -0.62286 | -0.54844 |
| H  | 0 | 2.54309  | -1.72075 | 0.61816  |
| H  | 0 | 2.17292  | -1.84962 | -1.12791 |
| C  | 0 | 1.90126  | 8.28271  | 0.39404  |
| H  | 0 | 2.87013  | 7.85431  | 0.68034  |
| H  | 0 | 2.03188  | 8.86892  | -0.52824 |
| H  | 0 | 1.56145  | 8.95497  | 1.19619  |
| C  | 0 | -0.53918 | -1.83605 | 0.30392  |
| H  | 0 | -0.38186 | -2.46249 | -0.59103 |
| H  | 0 | -0.09113 | -2.36407 | 1.1636   |
| H  | 0 | -1.62183 | -1.77487 | 0.48047  |
| C  | 0 | -1.05814 | 8.66908  | -0.37289 |
| H  | 0 | -1.0115  | 9.30603  | 0.52724  |

|    |   |          |         |          |
|----|---|----------|---------|----------|
| H  | 0 | -0.62265 | 9.24211 | -1.20989 |
| H  | 0 | -2.11845 | 8.49848 | -0.60457 |
| Cu | 0 | -0.94082 | 3.40927 | -0.03797 |

*trans*-Cu(II)(OSe)<sub>2</sub>

|    |   |          |          |          |
|----|---|----------|----------|----------|
| C  | 0 | -0.09587 | -0.49092 | -0.01138 |
| N  | 0 | 1.28571  | -0.23535 | -0.00311 |
| C  | 0 | -0.69194 | 0.75619  | -0.02433 |
| C  | 0 | 1.47575  | 1.10989  | -0.01062 |
| N  | 0 | 0.29857  | 1.72636  | -0.02361 |
| H  | 0 | 2.45292  | 1.58395  | -0.00659 |
| C  | 0 | -1.20039 | 7.32199  | -0.07121 |
| N  | 0 | -2.58199 | 7.06649  | -0.07953 |
| C  | 0 | -0.60437 | 6.07486  | -0.0588  |
| C  | 0 | -2.77208 | 5.72126  | -0.07222 |
| N  | 0 | -1.59492 | 5.10473  | -0.05969 |
| H  | 0 | -3.74927 | 5.24724  | -0.07624 |
| Se | 0 | -2.43265 | 1.51068  | -0.04217 |
| Se | 0 | 1.13632  | 5.32033  | -0.04123 |
| C  | 0 | 2.33702  | -1.24078 | 0.0111   |
| H  | 0 | 3.31149  | -0.73676 | 0.0153   |
| H  | 0 | 2.25931  | -1.87117 | 0.9095   |
| H  | 0 | 2.27283  | -1.88244 | -0.88037 |
| C  | 0 | -3.63325 | 8.07196  | -0.09362 |
| H  | 0 | -4.60775 | 7.56799  | -0.09754 |
| H  | 0 | -3.56883 | 8.7137   | 0.79778  |
| H  | 0 | -3.55572 | 8.70228  | -0.99209 |
| C  | 0 | -0.68005 | -1.85951 | -0.00629 |
| H  | 0 | -0.38544 | -2.45022 | -0.89084 |
| H  | 0 | -0.39856 | -2.43801 | 0.89053  |
| H  | 0 | -1.77514 | -1.77138 | -0.01496 |
| C  | 0 | -0.61616 | 8.69056  | -0.07586 |
| H  | 0 | -0.89763 | 9.26936  | -0.97249 |
| H  | 0 | -0.91074 | 9.28101  | 0.80889  |
| H  | 0 | 0.47893  | 8.60239  | -0.06722 |
| Cu | 0 | -0.6482  | 3.41553  | -0.04169 |

*Cis*- $\delta$ -Cu(II)(ESe)<sub>2</sub>

|   |   |          |         |         |
|---|---|----------|---------|---------|
| C | 0 | -2.48612 | 1.56109 | 0.37509 |
| N | 0 | -1.73277 | 0.43806 | 0.04735 |

|    |   |          |          |          |
|----|---|----------|----------|----------|
| C  | 0 | -3.81652 | 1.22905  | 0.2697   |
| C  | 0 | -2.58479 | -0.56061 | -0.23107 |
| N  | 0 | -3.86292 | -0.11152 | -0.11422 |
| H  | 0 | -4.71637 | 1.81799  | 0.41339  |
| C  | 0 | 2.48601  | 1.56145  | -0.37537 |
| N  | 0 | 1.73267  | 0.43813  | -0.0486  |
| C  | 0 | 3.81641  | 1.22934  | -0.27023 |
| C  | 0 | 2.5847   | -0.56079 | 0.2289   |
| N  | 0 | 3.86282  | -0.1116  | 0.1124   |
| H  | 0 | 4.71625  | 1.81842  | -0.41336 |
| Se | 0 | -1.82355 | -2.2398  | -0.60668 |
| Se | 0 | 1.82348  | -2.24033 | 0.603    |
| C  | 0 | 1.8713   | 2.86604  | -0.75655 |
| H  | 0 | 1.21923  | 2.75543  | -1.63754 |
| H  | 0 | 1.25543  | 3.27167  | 0.06148  |
| H  | 0 | 2.64828  | 3.60479  | -0.99765 |
| C  | 0 | -1.87143 | 2.86536  | 0.75742  |
| H  | 0 | -1.21935 | 2.75397  | 1.63831  |
| H  | 0 | -1.25556 | 3.27172  | -0.06026 |
| H  | 0 | -2.64841 | 3.60388  | 0.99918  |
| H  | 0 | 4.69656  | -0.67338 | 0.24929  |
| H  | 0 | -4.69665 | -0.67318 | -0.25165 |
| Cu | 0 | -0.00004 | -0.64665 | -0.00111 |

*Cis-ε-Cu(II)(ESe)<sub>2</sub>*

|    |   |          |          |          |
|----|---|----------|----------|----------|
| C  | 0 | 3.6884   | 1.44882  | 0.08099  |
| N  | 0 | 3.83208  | 0.0554   | 0.07928  |
| C  | 0 | 2.33169  | 1.66768  | 0.05551  |
| H  | 0 | 4.70819  | -0.45758 | 0.09453  |
| C  | 0 | 2.5926   | -0.51237 | 0.05364  |
| N  | 0 | 1.66536  | 0.45198  | 0.03887  |
| H  | 0 | 1.80445  | 2.617    | 0.04851  |
| C  | 0 | -3.68878 | 1.44811  | -0.08047 |
| N  | 0 | -3.83218 | 0.05466  | -0.07935 |
| C  | 0 | -2.33221 | 1.66724  | -0.0499  |
| H  | 0 | -4.7081  | -0.4585  | -0.09871 |
| C  | 0 | -2.5927  | -0.51286 | -0.04882 |
| N  | 0 | -1.66572 | 0.45168  | -0.03009 |
| H  | 0 | -1.80521 | 2.61667  | -0.0406  |
| Se | 0 | 1.95271  | -2.28191 | 0.03578  |

|    |   |          |          |          |
|----|---|----------|----------|----------|
| Se | 0 | -1.95246 | -2.28228 | -0.03132 |
| C  | 0 | -4.8534  | 2.37868  | -0.1097  |
| H  | 0 | -5.47117 | 2.24169  | -1.01343 |
| H  | 0 | -5.5108  | 2.24817  | 0.76663  |
| H  | 0 | -4.49708 | 3.41768  | -0.10554 |
| C  | 0 | 4.85293  | 2.37962  | 0.10654  |
| H  | 0 | 5.4731   | 2.24339  | 1.00875  |
| H  | 0 | 5.50804  | 2.2486   | -0.77142 |
| H  | 0 | 4.4964   | 3.41855  | 0.10258  |
| Cu | 0 | -0.00006 | -0.70237 | 0.00379  |

*Trans- $\delta$ -Cu(II)(ESe)<sub>2</sub>*

|    |   |          |          |          |
|----|---|----------|----------|----------|
| C  | 0 | 3.07189  | 0.8703   | 0.06008  |
| N  | 0 | 1.92847  | 0.0772   | 0.06055  |
| C  | 0 | 4.15753  | 0.02783  | 0.06048  |
| C  | 0 | 2.29995  | -1.21297 | 0.06042  |
| N  | 0 | 3.65689  | -1.27694 | 0.05991  |
| H  | 0 | 5.22227  | 0.23496  | 0.0606   |
| C  | 0 | -3.07185 | -0.87032 | 0.06005  |
| N  | 0 | -1.92842 | -0.07722 | 0.06052  |
| C  | 0 | -4.15749 | -0.02785 | 0.06042  |
| C  | 0 | -2.29991 | 1.21294  | 0.06039  |
| N  | 0 | -3.65684 | 1.27692  | 0.05986  |
| H  | 0 | -5.22223 | -0.23498 | 0.06054  |
| Se | 0 | 0.92525  | -2.49206 | 0.0606   |
| Se | 0 | -0.9252  | 2.49204  | 0.06057  |
| C  | 0 | -3.02353 | -2.36071 | 0.05978  |
| H  | 0 | -2.49292 | -2.74178 | -0.82705 |
| H  | 0 | -2.49312 | -2.74205 | 0.9466   |
| H  | 0 | -4.03959 | -2.77901 | 0.05961  |
| C  | 0 | 3.02357  | 2.36068  | 0.0598   |
| H  | 0 | 2.49298  | 2.74175  | -0.82704 |
| H  | 0 | 2.49315  | 2.74203  | 0.94661  |
| H  | 0 | 4.03964  | 2.77899  | 0.05964  |
| H  | 0 | -4.19963 | 2.13407  | 0.05953  |
| H  | 0 | 4.19968  | -2.13409 | 0.05959  |
| Cu | 0 | 0.00002  | -0.00001 | 0.06067  |

*Trans- $\epsilon$ -Cu(II)(ESe)<sub>2</sub>*

|   |   |          |          |        |
|---|---|----------|----------|--------|
| C | 0 | -4.15161 | -0.36975 | 0.0174 |
|---|---|----------|----------|--------|

|    |   |          |          |          |
|----|---|----------|----------|----------|
| N  | 0 | -3.74771 | 0.97262  | 0.01758  |
| C  | 0 | -2.9864  | -1.09682 | 0.01706  |
| H  | 0 | -4.35871 | 1.78361  | 0.01829  |
| C  | 0 | -2.38583 | 1.02617  | 0.01627  |
| N  | 0 | -1.90881 | -0.22597 | 0.01582  |
| H  | 0 | -2.85488 | -2.17437 | 0.01706  |
| C  | 0 | 4.15399  | 0.3687   | 0.01728  |
| N  | 0 | 3.75009  | -0.97368 | 0.01759  |
| C  | 0 | 2.98878  | 1.09576  | 0.01696  |
| H  | 0 | 4.36109  | -1.78466 | 0.01837  |
| C  | 0 | 2.38821  | -1.02723 | 0.01624  |
| N  | 0 | 1.91119  | 0.22492  | 0.01572  |
| H  | 0 | 2.85726  | 2.17332  | 0.01691  |
| Se | 0 | -1.12816 | 2.42062  | 0.01577  |
| Se | 0 | 1.13054  | -2.42168 | 0.01582  |
| C  | 0 | 5.58692  | 0.7793   | 0.0177   |
| H  | 0 | 6.12339  | 0.41011  | 0.90818  |
| H  | 0 | 6.12398  | 0.4102   | -0.87246 |
| H  | 0 | 5.65737  | 1.87529  | 0.01779  |
| C  | 0 | -5.58454 | -0.78036 | 0.0179   |
| H  | 0 | -6.12098 | -0.41111 | 0.90838  |
| H  | 0 | -6.12163 | -0.41131 | -0.87226 |
| H  | 0 | -5.65499 | -1.87635 | 0.01805  |
| Cu | 0 | 0.00119  | -0.00053 | 0.01564  |

Cu(I)(ESeH)<sub>3</sub>

|   |   |          |          |          |
|---|---|----------|----------|----------|
| C | 0 | 4.10529  | -1.86633 | 0.95101  |
| N | 0 | 2.96856  | -1.41599 | 0.27801  |
| C | 0 | 4.03847  | -3.23138 | 0.91866  |
| H | 0 | 2.71368  | -0.43162 | 0.08776  |
| C | 0 | 2.21569  | -2.45042 | -0.16967 |
| N | 0 | 2.87595  | -3.56693 | 0.232    |
| H | 0 | 4.71085  | -3.98094 | 1.32044  |
| H | 0 | -4.96635 | -0.02551 | -0.25016 |
| N | 0 | -4.31136 | -0.75459 | 0.02208  |
| C | 0 | -4.63341 | -1.92426 | 0.71528  |
| C | 0 | -2.98721 | -0.71071 | -0.29326 |
| C | 0 | -3.45658 | -2.61087 | 0.82752  |
| N | 0 | -2.4687  | -1.85244 | 0.21131  |
| H | 0 | -3.24474 | -3.56819 | 1.29016  |

|    |   |          |          |          |
|----|---|----------|----------|----------|
| C  | 0 | 1.14501  | 2.95084  | -0.32282 |
| N  | 0 | -0.12269 | 3.09576  | 0.13442  |
| N  | 0 | 1.77204  | 4.1108   | 0.00209  |
| C  | 0 | -0.3085  | 4.34105  | 0.73657  |
| H  | 0 | -0.83999 | 2.36368  | -0.00586 |
| C  | 0 | 0.89805  | 4.97799  | 0.65015  |
| H  | 0 | 1.20292  | 5.96159  | 0.98915  |
| C  | 0 | -6.01365 | -2.23833 | 1.17745  |
| H  | 0 | -6.38912 | -1.47854 | 1.88133  |
| H  | 0 | -6.71929 | -2.29495 | 0.33335  |
| H  | 0 | -6.02538 | -3.20821 | 1.69076  |
| C  | 0 | 5.1157   | -0.94478 | 1.54072  |
| H  | 0 | 5.56325  | -0.29554 | 0.77199  |
| H  | 0 | 4.66927  | -0.29637 | 2.31104  |
| H  | 0 | 5.9227   | -1.52234 | 2.00928  |
| C  | 0 | -1.60999 | 4.77401  | 1.31672  |
| H  | 0 | -2.40432 | 4.78625  | 0.55407  |
| H  | 0 | -1.93294 | 4.10325  | 2.12845  |
| H  | 0 | -1.51927 | 5.78695  | 1.72914  |
| Se | 0 | 0.62878  | -2.41307 | -1.16922 |
| Se | 0 | 1.90877  | 1.50897  | -1.24831 |
| Se | 0 | -2.13205 | 0.64892  | -1.26301 |
| H  | 0 | 2.55109  | -4.50709 | 0.02277  |
| H  | 0 | 2.74252  | 4.29995  | -0.2336  |
| H  | 0 | -1.47455 | -2.1092  | 0.08274  |
| Cu | 0 | 0.13657  | -0.08259 | -1.26226 |

Cu(I)(OSeH)<sub>3</sub>

|   |          |          |          |
|---|----------|----------|----------|
| C | 5.74748  | -2.19247 | -0.49407 |
| H | 6.2806   | -2.74757 | 0.29535  |
| H | 6.49275  | -1.85986 | -1.23565 |
| C | 4.94762  | -1.06372 | 0.04995  |
| N | 5.50429  | -0.00412 | 0.77152  |
| C | 3.57826  | -0.82476 | -0.02793 |
| C | 4.53378  | 0.85471  | 1.12708  |
| N | 3.3741   | 0.37264  | 0.64934  |
| H | 4.67096  | 1.76436  | 1.70032  |
| C | -2.9945  | -1.35364 | 0.10137  |
| C | -4.19493 | -2.0344  | 0.26286  |
| N | -2.75315 | -0.72326 | 1.31742  |

|                  |          |          |                |
|------------------|----------|----------|----------------|
| C                | -4.93942 | -2.89515 | -0.69362       |
| N                | -4.6256  | -1.78661 | 1.5701         |
| C                | -3.7363  | -0.9909  | 2.18925        |
| H                | -5.94034 | -2.49602 | -0.92666       |
| H                | -5.06523 | -3.92333 | -0.31674       |
| H                | -3.80465 | -0.64042 | 3.21316        |
| H                | -0.92617 | 5.43951  | 1.42784        |
| C                | -0.18023 | 4.78477  | 0.94838        |
| H                | 0.55931  | 5.42987  | 0.44593        |
| C                | -0.80219 | 3.80758  | 0.01612        |
| N                | -1.55981 | 4.18349  | -1.09825       |
| C                | -0.77836 | 2.42007  | 0.02844        |
| C                | -1.9829  | 3.07783  | -1.73787       |
| N                | -1.52177 | 2.01334  | -1.07232       |
| H                | -2.58538 | 3.06037  | -2.63979       |
| H                | 5.06432  | -2.89158 | -0.99508       |
| H                | -4.36911 | -2.94807 | -1.63084       |
| H                | 0.33775  | 4.22824  | 1.74113        |
| C                | 6.92064  | 0.14768  | 1.09678        |
| H                | 7.25987  | -0.70044 | 1.70698        |
| H                | 7.51584  | 0.18959  | 0.17456        |
| H                | 7.06187  | 1.07732  | 1.66036        |
| C                | -5.8433  | -2.32019 | 2.17808        |
| H                | -6.72467 | -1.97917 | 1.61833        |
| H                | -5.81504 | -3.41822 | 2.1744         |
| H                | -5.91224 | -1.96479 | 3.21278        |
| C                | -1.84394 | 5.55636  | -1.51338       |
| H                | -2.39446 | 6.08411  | -0.7229        |
| H                | -0.90641 | 6.08971  | -1.72086       |
| H                | -2.45375 | 5.53471  | -2.42406       |
| Se               | 0.05386  | 1.20993  | 1.23761        |
| Se               | -1.82457 | -1.29036 | -1.39006       |
| Se               | 2.21769  | -1.83365 | -0.86128       |
| Cu               | 0.25643  | -0.70324 | -0.30612       |
| H                | -1.67345 | 0.99439  | -1.32223       |
| H                | 2.43664  | 0.7983   | 0.76482        |
| H                | -1.90553 | -0.13945 | 1.49291        |
| ESe <sup>-</sup> |          |          |                |
| C                | 0        | -1.33424 | 0.34264 -1.687 |



|    |   |          |          |          |
|----|---|----------|----------|----------|
| N  | 0 | -1.22439 | -0.53608 | -0.61595 |
| C  | 0 | -0.02408 | 0.5672   | -2.05782 |
| H  | 0 | -1.96959 | -0.94464 | -0.05994 |
| C  | 0 | 0.11761  | -0.81122 | -0.37537 |
| N  | 0 | 0.86433  | -0.13277 | -1.26265 |
| H  | 0 | 0.32449  | 1.20793  | -2.86996 |
| Se | 0 | 0.62171  | -1.97816 | 1.02109  |
| C  | 0 | -2.63494 | 0.84905  | -2.21425 |
| H  | 0 | -3.29533 | 0.03881  | -2.58004 |
| H  | 0 | -3.21326 | 1.41659  | -1.45934 |
| H  | 0 | -2.45038 | 1.52751  | -3.06186 |

#### ESeH

|    |   |          |          |          |
|----|---|----------|----------|----------|
| C  | 0 | -1.3215  | 0.35009  | -1.69488 |
| N  | 0 | -1.22439 | -0.53366 | -0.61785 |
| C  | 0 | -0.03747 | 0.59643  | -2.0852  |
| H  | 0 | -1.99499 | -0.92486 | -0.08446 |
| C  | 0 | 0.08043  | -0.85114 | -0.31803 |
| N  | 0 | 0.79721  | -0.13592 | -1.24435 |
| H  | 0 | 0.34248  | 1.22525  | -2.88259 |
| Se | 0 | 0.70538  | -1.95771 | 0.99605  |
| C  | 0 | -2.62299 | 0.8504   | -2.21884 |
| H  | 0 | -3.26403 | 0.0256   | -2.57152 |
| H  | 0 | -3.18559 | 1.40482  | -1.44959 |
| H  | 0 | -2.45208 | 1.52904  | -3.06506 |
| H  | 0 | 1.81096  | -0.17213 | -1.27004 |

#### ESeSeE

|   |   |          |          |          |
|---|---|----------|----------|----------|
| C | 0 | 4.78199  | -1.3467  | -1.11102 |
| N | 0 | 3.43181  | -1.6006  | -0.98814 |
| C | 0 | 5.40541  | -2.47332 | -0.59277 |
| H | 0 | 2.63472  | -0.96278 | -1.18787 |
| C | 0 | 3.30554  | -2.82636 | -0.38123 |
| N | 0 | 4.48334  | -3.38237 | -0.12584 |
| H | 0 | 6.47428  | -2.66621 | -0.52508 |
| C | 0 | -1.30344 | 0.34735  | -1.68374 |
| N | 0 | -1.27829 | -0.4907  | -0.58264 |
| C | 0 | 0.02821  | 0.50807  | -2.01865 |
| H | 0 | -2.08329 | -0.86033 | -0.08357 |
| C | 0 | 0.03074  | -0.78889 | -0.28981 |

|    |   |          |          |          |
|----|---|----------|----------|----------|
| N  | 0 | 0.84464  | -0.18681 | -1.15108 |
| H  | 0 | 0.43804  | 1.09265  | -2.83899 |
| Se | 0 | 1.62568  | -3.65755 | -0.06664 |
| Se | 0 | 0.53572  | -1.91676 | 1.1664   |
| C  | 0 | -2.55993 | 0.89303  | -2.2736  |
| H  | 0 | -3.24218 | 0.09303  | -2.60558 |
| H  | 0 | -3.11044 | 1.52693  | -1.5587  |
| H  | 0 | -2.31979 | 1.51025  | -3.14969 |
| C  | 0 | 5.32887  | -0.08236 | -1.68497 |
| H  | 0 | 4.9979   | 0.07467  | -2.72509 |
| H  | 0 | 5.01949  | 0.80154  | -1.10284 |
| H  | 0 | 6.42697  | -0.11784 | -1.68389 |

#### OSe<sup>-</sup>

|    |   |          |          |          |
|----|---|----------|----------|----------|
| C  | 0 | -1.02073 | 1.77877  | -0.48221 |
| N  | 0 | -1.54959 | 0.49054  | -0.35167 |
| C  | 0 | -0.21577 | 1.98868  | 0.64311  |
| C  | 0 | -1.05156 | -0.01532 | 0.82409  |
| N  | 0 | -0.25791 | 0.83977  | 1.44436  |
| H  | 0 | -1.31358 | -1.01845 | 1.1649   |
| Se | 0 | 0.77777  | 3.55849  | 1.043    |
| C  | 0 | -2.43655 | -0.18057 | -1.27186 |
| H  | 0 | -2.67264 | -1.17984 | -0.87542 |
| H  | 0 | -3.38245 | 0.37472  | -1.40199 |
| H  | 0 | -1.97419 | -0.3014  | -2.26786 |
| C  | 0 | -1.31415 | 2.67775  | -1.62991 |
| H  | 0 | -0.9864  | 2.26863  | -2.60649 |
| H  | 0 | -2.38772 | 2.93662  | -1.7252  |
| H  | 0 | -0.75328 | 3.60886  | -1.44324 |

#### OSeH

|    |   |          |          |          |
|----|---|----------|----------|----------|
| C  | 0 | -0.94948 | 1.74493  | -0.47148 |
| N  | 0 | -1.51521 | 0.48296  | -0.34573 |
| C  | 0 | -0.10423 | 1.85862  | 0.62459  |
| C  | 0 | -0.99574 | -0.07897 | 0.79627  |
| N  | 0 | -0.13647 | 0.71981  | 1.40056  |
| H  | 0 | -1.28451 | -1.07495 | 1.12758  |
| Se | 0 | 1.05237  | 3.33977  | 0.99565  |
| C  | 0 | -2.47525 | -0.12991 | -1.25036 |
| H  | 0 | -2.71958 | -1.13288 | -0.87748 |

|   |   |          |          |          |
|---|---|----------|----------|----------|
| H | 0 | -3.40197 | 0.4615   | -1.30157 |
| H | 0 | -2.05671 | -0.22302 | -2.26386 |
| C | 0 | -1.27856 | 2.68127  | -1.58217 |
| H | 0 | -0.95472 | 2.29964  | -2.56566 |
| H | 0 | -2.36096 | 2.88544  | -1.64658 |
| H | 0 | -0.76351 | 3.63541  | -1.40501 |
| H | 0 | 0.29897  | 3.81404  | 2.18549  |

#### OSeH<sub>t</sub>

|    |   |          |          |          |
|----|---|----------|----------|----------|
| C  | 0 | -1.0203  | 1.77829  | -0.47932 |
| N  | 0 | -1.53574 | 0.49181  | -0.32938 |
| C  | 0 | -0.2046  | 2.04575  | 0.63147  |
| C  | 0 | -1.08434 | -0.05352 | 0.81387  |
| N  | 0 | -0.28752 | 0.86747  | 1.39595  |
| H  | 0 | -1.32402 | -1.04374 | 1.18212  |
| Se | 0 | 0.7969   | 3.51968  | 1.12207  |
| C  | 0 | -2.43214 | -0.17362 | -1.26689 |
| H  | 0 | -2.67121 | -1.17511 | -0.88864 |
| H  | 0 | -3.36128 | 0.40318  | -1.37537 |
| H  | 0 | -1.95056 | -0.26413 | -2.25059 |
| C  | 0 | -1.32011 | 2.66109  | -1.63535 |
| H  | 0 | -0.98681 | 2.23524  | -2.59755 |
| H  | 0 | -2.39381 | 2.90083  | -1.72438 |
| H  | 0 | -0.77323 | 3.60145  | -1.47092 |
| H  | 0 | 0.21029  | 0.76389  | 2.27726  |

#### OSeSeO

|    |   |          |          |          |
|----|---|----------|----------|----------|
| C  | 0 | 0.22713  | 0.75098  | 0.00362  |
| N  | 0 | -0.86384 | -0.09857 | -0.05971 |
| C  | 0 | -0.221   | 1.84734  | 0.73549  |
| C  | 0 | -1.89022 | 0.5099   | 0.63028  |
| N  | 0 | -1.53885 | 1.68149  | 1.11873  |
| H  | 0 | -2.86566 | 0.03765  | 0.7347   |
| C  | 0 | -1.24115 | 6.69338  | -0.04673 |
| N  | 0 | -2.55772 | 6.94461  | -0.39238 |
| C  | 0 | -0.88715 | 5.57365  | -0.79463 |
| C  | 0 | -2.92128 | 5.99074  | -1.31852 |
| N  | 0 | -1.9422  | 5.1498   | -1.58097 |
| H  | 0 | -3.91731 | 5.97306  | -1.75784 |
| Se | 0 | 0.78659  | 3.39261  | 1.20779  |

|    |   |          |          |          |
|----|---|----------|----------|----------|
| Se | 0 | 0.80437  | 4.69916  | -0.80844 |
| C  | 0 | -0.9233  | -1.38496 | -0.73594 |
| H  | 0 | -1.92923 | -1.80452 | -0.60645 |
| H  | 0 | -0.72455 | -1.27173 | -1.81232 |
| H  | 0 | -0.19096 | -2.08807 | -0.31088 |
| C  | 0 | -3.40423 | 8.00583  | 0.13001  |
| H  | 0 | -4.39385 | 7.92949  | -0.33852 |
| H  | 0 | -3.52226 | 7.91259  | 1.22009  |
| H  | 0 | -2.98159 | 8.99598  | -0.09877 |
| C  | 0 | 1.53807  | 0.45105  | -0.63347 |
| H  | 0 | 1.93733  | -0.5294  | -0.32332 |
| H  | 0 | 1.47584  | 0.45304  | -1.73531 |
| H  | 0 | 2.26035  | 1.22458  | -0.33914 |
| C  | 0 | -0.48322 | 7.50743  | 0.94185  |
| H  | 0 | -0.50055 | 8.58282  | 0.69664  |
| H  | 0 | -0.87743 | 7.39193  | 1.96615  |
| H  | 0 | 0.56326  | 7.1735   | 0.94794  |
